# Supplementary material
Source: publisher figshare collection journal article supplement (https://acs.figshare.com/ndownloader/files/3808960)
Supplement: Supplementary file 1 [file 3808960]

 
data_j1 
 
_audit_creation_method            SHELXL-97 
_chemical_name_systematic 
; 
 ? 
; 
_chemical_name_common             ? 
_chemical_melting_point           ? 
_chemical_formula_moiety          ? 
_chemical_formula_sum 
 'C32 H32 N8 Ni4 O4 S4' 
_chemical_formula_weight          955.70 
 
loop_ 
 _atom_type_symbol 
 _atom_type_description 
 _atom_type_scat_dispersion_real 
 _atom_type_scat_dispersion_imag 
 _atom_type_scat_source 
 'C'  'C'   0.0033   0.0016 
 'International Tables Vol C Tables 4.2.6.8 and 6.1.1.4' 
 'H'  'H'   0.0000   0.0000 
 'International Tables Vol C Tables 4.2.6.8 and 6.1.1.4' 
 'N'  'N'   0.0061   0.0033 
 'International Tables Vol C Tables 4.2.6.8 and 6.1.1.4' 
 'O'  'O'   0.0106   0.0060 
 'International Tables Vol C Tables 4.2.6.8 and 6.1.1.4' 
 'S'  'S'   0.1246   0.1234 
 'International Tables Vol C Tables 4.2.6.8 and 6.1.1.4' 
 'Ni'  'Ni'   0.3393   1.1124 
 'International Tables Vol C Tables 4.2.6.8 and 6.1.1.4' 
 
_symmetry_cell_setting            'Monoclinic'
_symmetry_space_group_name_H-M    'C2/c'
 
loop_ 
 _symmetry_equiv_pos_as_xyz 
 'x, y, z' 
 '-x, y, -z+1/2' 
 'x+1/2, y+1/2, z' 
 '-x+1/2, y+1/2, -z+1/2' 
 '-x, -y, -z' 
 'x, -y, z-1/2' 
 '-x+1/2, -y+1/2, -z' 
 'x+1/2, -y+1/2, z-1/2' 
 
_cell_length_a                    19.4038(19) 
_cell_length_b                    13.7950(14) 
_cell_length_c                    15.5713(16) 
_cell_angle_alpha                 90.00 
_cell_angle_beta                  126.8520(10) 
_cell_angle_gamma                 90.00 
_cell_volume                      3335.2(6) 
_cell_formula_units_Z             4 
_cell_measurement_temperature     100(2) 
_cell_measurement_reflns_used     3785
_cell_measurement_theta_min       2.62
_cell_measurement_theta_max       24.97
 
_exptl_crystal_description        plate
_exptl_crystal_colour             red
_exptl_crystal_size_max           0.15 
_exptl_crystal_size_mid           0.08 
_exptl_crystal_size_min           0.03 
_exptl_crystal_density_meas       ? 
_exptl_crystal_density_diffrn     1.903 
_exptl_crystal_density_method     'not measured' 
_exptl_crystal_F_000              1952 
_exptl_absorpt_coefficient_mu     2.528 
_exptl_absorpt_correction_type    multi-scan 
_exptl_absorpt_correction_T_min   0.7029 
_exptl_absorpt_correction_T_max   0.9280 
_exptl_absorpt_process_details    'BRUKER SADABS'
 
_exptl_special_details 
; 
 ? 
; 
 
_diffrn_ambient_temperature       100(2) 
_diffrn_radiation_wavelength      0.71073 
_diffrn_radiation_type            MoK\a 
_diffrn_radiation_source          'fine-focus sealed tube' 
_diffrn_radiation_monochromator   graphite 
_diffrn_measurement_device_type   'Bruker SMART APEX-II CCD'
_diffrn_measurement_method        'OMEGA SCAN' 
_diffrn_detector_area_resol_mean  ? 
_diffrn_reflns_number             19261 
_diffrn_reflns_av_R_equivalents   0.0566 
_diffrn_reflns_av_sigmaI/netI     0.0363 
_diffrn_reflns_limit_h_min        -23 
_diffrn_reflns_limit_h_max        23 
_diffrn_reflns_limit_k_min        -16 
_diffrn_reflns_limit_k_max        16 
_diffrn_reflns_limit_l_min        -19 
_diffrn_reflns_limit_l_max        19 
_diffrn_reflns_theta_min          1.97 
_diffrn_reflns_theta_max          25.99 
_reflns_number_total              3274 
_reflns_number_gt                 2657 
_reflns_threshold_expression      >2sigma(I) 
 
_computing_data_collection        'Bruker APEX2'
_computing_cell_refinement        'Bruker SAINT'
_computing_data_reduction         'Bruker SAINT' 
_computing_structure_solution     'SHELXS-97 (Sheldrick, 2008)' 
_computing_structure_refinement   'SHELXL-97 (Sheldrick, 2008)' 
_computing_molecular_graphics     'Bruker SHELXTL'
_computing_publication_material   'Bruker SHELXTL'
 
_refine_special_details 
; 
 Refinement of F^2^ against ALL reflections.  The weighted R-factor wR and 
 goodness of fit S are based on F^2^, conventional R-factors R are based 
 on F, with F set to zero for negative F^2^. The threshold expression of 
 F^2^ > 2sigma(F^2^) is used only for calculating R-factors(gt) etc. and is 
 not relevant to the choice of reflections for refinement.  R-factors based 
 on F^2^ are statistically about twice as large as those based on F, and R- 
 factors based on ALL data will be even larger. 
; 
 
_refine_ls_structure_factor_coef  Fsqd  
_refine_ls_matrix_type            full 
_refine_ls_weighting_scheme       calc  
_refine_ls_weighting_details 
 'calc w=1/[\s^2^(Fo^2^)+(0.0484P)^2^+17.1617P] where P=(Fo^2^+2Fc^2^)/3' 
_atom_sites_solution_primary      direct 
_atom_sites_solution_secondary    difmap 
_atom_sites_solution_hydrogens    geom 
_refine_ls_hydrogen_treatment     constr 
_refine_ls_extinction_method      none 
_refine_ls_extinction_coef        ? 
_refine_ls_number_reflns          3274 
_refine_ls_number_parameters      263 
_refine_ls_number_restraints      44 
_refine_ls_R_factor_all           0.0526 
_refine_ls_R_factor_gt            0.0393 
_refine_ls_wR_factor_ref          0.1113 
_refine_ls_wR_factor_gt           0.1031 
_refine_ls_goodness_of_fit_ref    1.080 
_refine_ls_restrained_S_all       1.073 
_refine_ls_shift/su_max           0.001 
_refine_ls_shift/su_mean          0.000 
 
loop_ 
 _atom_site_label 
 _atom_site_type_symbol 
 _atom_site_fract_x 
 _atom_site_fract_y 
 _atom_site_fract_z 
 _atom_site_U_iso_or_equiv 
 _atom_site_adp_type 
 _atom_site_occupancy 
 _atom_site_symmetry_multiplicity 
 _atom_site_calc_flag 
 _atom_site_refinement_flags 
 _atom_site_disorder_assembly 
 _atom_site_disorder_group 
Ni1 Ni 0.89843(4) 0.77868(4) 0.17123(4) 0.02246(17) Uani 1 1 d . A . 
Ni2 Ni 1.00781(4) 0.99279(4) 0.35550(4) 0.02348(17) Uani 1 1 d . . . 
S1 S 0.87788(8) 0.89979(8) 0.07142(9) 0.0262(3) Uani 1 1 d D . . 
S2 S 0.91943(8) 0.87248(8) 0.30062(9) 0.0270(3) Uani 1 1 d . . . 
N1 N 0.8779(3) 0.6986(3) 0.0615(3) 0.0346(10) Uani 1 1 d D . . 
N2 N 0.8996(2) 0.6565(3) 0.2352(3) 0.0260(8) Uani 1 1 d . . . 
N3 N 0.9137(2) 1.0760(3) 0.2866(3) 0.0255(8) Uani 1 1 d . . . 
N4 N 1.0727(2) 1.1111(3) 0.4200(3) 0.0228(8) Uani 1 1 d . . . 
O1 O 0.8446(7) 0.5380(12) 0.0021(13) 0.033(3) Uani 0.50 1 d P . . 
O1' O 0.8800(8) 0.5389(12) 0.0181(14) 0.038(3) Uani 0.50 1 d PD A . 
O2 O 0.8755(2) 1.2375(2) 0.2539(3) 0.0355(8) Uani 1 1 d . . . 
C1 C 0.8808(13) 0.8338(11) -0.0305(15) 0.026(4) Uani 0.46(2) 1 d PDU A 1 
H1A H 0.8498 0.8711 -0.0983 0.031 Uiso 0.46(2) 1 calc PR A 1 
H1B H 0.9411 0.8246 -0.0044 0.031 Uiso 0.46(2) 1 calc PR A 1 
C2 C 0.8380(11) 0.7366(7) -0.0489(9) 0.025(3) Uani 0.46(2) 1 d PDU A 1 
H2A H 0.8494 0.6926 -0.0893 0.030 Uiso 0.46(2) 1 calc PR A 1 
H2B H 0.7749 0.7442 -0.0893 0.030 Uiso 0.46(2) 1 calc PR A 1 
C1' C 0.8500(12) 0.8358(10) -0.0488(12) 0.034(4) Uani 0.54(2) 1 d PDU A 2 
H1'1 H 0.7867 0.8294 -0.1008 0.040 Uiso 0.54(2) 1 calc PR A 2 
H1'2 H 0.8710 0.8729 -0.0833 0.040 Uiso 0.54(2) 1 calc PR A 2 
C2' C 0.8909(10) 0.7371(7) -0.0171(9) 0.031(3) Uani 0.54(2) 1 d PDU A 2 
H2'1 H 0.9531 0.7418 0.0160 0.038 Uiso 0.54(2) 1 calc PR A 2 
H2'2 H 0.8632 0.6942 -0.0806 0.038 Uiso 0.54(2) 1 calc PR A 2 
C3 C 0.8745(4) 0.6034(3) 0.0722(4) 0.0343(12) Uani 1 1 d D A . 
C4 C 0.8849(3) 0.5802(3) 0.1725(4) 0.0260(10) Uani 1 1 d . A . 
C5 C 0.8786(3) 0.4857(4) 0.1998(4) 0.0334(11) Uani 1 1 d . . . 
H5 H 0.8695 0.4323 0.1556 0.040 Uiso 1 1 calc R A . 
C6 C 0.8861(4) 0.4724(4) 0.2927(5) 0.0417(14) Uani 1 1 d . A . 
H6 H 0.8806 0.4093 0.3125 0.050 Uiso 1 1 calc R . . 
C7 C 0.9013(5) 0.5494(4) 0.3559(5) 0.0576(19) Uani 1 1 d . . . 
H7 H 0.9074 0.5405 0.4206 0.069 Uiso 1 1 calc R A . 
C8 C 0.9080(4) 0.6415(4) 0.3254(4) 0.0429(14) Uani 1 1 d . A . 
H8 H 0.9189 0.6951 0.3702 0.052 Uiso 1 1 calc R . . 
C9 C 0.8201(3) 0.9408(3) 0.2471(4) 0.0324(11) Uani 1 1 d . A . 
H9A H 0.7704 0.9056 0.1851 0.039 Uiso 1 1 calc R . . 
H9B H 0.8108 0.9463 0.3029 0.039 Uiso 1 1 calc R . . 
C10 C 0.8253(3) 1.0414(4) 0.2119(4) 0.0306(11) Uani 1 1 d . A . 
H10A H 0.8088 1.0390 0.1382 0.037 Uiso 1 1 calc R . . 
H10B H 0.7854 1.0858 0.2122 0.037 Uiso 1 1 calc R . . 
C11 C 0.9287(3) 1.1710(3) 0.2981(4) 0.0269(10) Uani 1 1 d . A . 
C12 C 1.0224(3) 1.1915(3) 0.3789(4) 0.0262(10) Uani 1 1 d . A . 
C13 C 1.0562(3) 1.2836(3) 0.4142(4) 0.0320(11) Uani 1 1 d . . . 
H13 H 1.0202 1.3391 0.3825 0.038 Uiso 1 1 calc R A . 
C14 C 1.1431(3) 1.2936(3) 0.4966(4) 0.0335(11) Uani 1 1 d . A . 
H14 H 1.1676 1.3563 0.5220 0.040 Uiso 1 1 calc R . . 
C15 C 1.1935(3) 1.2131(3) 0.5410(4) 0.0321(11) Uani 1 1 d . . . 
H15 H 1.2527 1.2189 0.5997 0.038 Uiso 1 1 calc R A . 
C16 C 1.1570(3) 1.1221(3) 0.4992(4) 0.0270(10) Uani 1 1 d . A . 
H16 H 1.1929 1.0664 0.5276 0.032 Uiso 1 1 calc R . . 
 
loop_ 
 _atom_site_aniso_label 
 _atom_site_aniso_U_11 
 _atom_site_aniso_U_22 
 _atom_site_aniso_U_33 
 _atom_site_aniso_U_23 
 _atom_site_aniso_U_13 
 _atom_site_aniso_U_12 
Ni1 0.0306(3) 0.0166(3) 0.0248(3) -0.0028(2) 0.0191(3) -0.0037(2) 
Ni2 0.0314(3) 0.0176(3) 0.0241(3) -0.0005(2) 0.0180(3) 0.0030(2) 
S1 0.0337(6) 0.0178(5) 0.0284(6) -0.0017(4) 0.0194(5) -0.0039(4) 
S2 0.0351(7) 0.0217(6) 0.0282(6) -0.0029(4) 0.0212(5) 0.0007(5) 
N1 0.059(3) 0.022(2) 0.032(2) -0.0033(17) 0.032(2) -0.0095(19) 
N2 0.030(2) 0.024(2) 0.025(2) 0.0011(16) 0.0181(18) 0.0029(16) 
N3 0.031(2) 0.0214(19) 0.029(2) 0.0006(16) 0.0206(18) 0.0036(16) 
N4 0.030(2) 0.0208(19) 0.0215(19) 0.0009(15) 0.0173(18) 0.0039(15) 
O1 0.046(8) 0.019(4) 0.034(5) -0.007(3) 0.024(7) -0.009(6) 
O1' 0.061(9) 0.021(4) 0.044(7) -0.013(4) 0.038(9) -0.015(7) 
O2 0.040(2) 0.0284(18) 0.0356(19) 0.0040(15) 0.0213(17) 0.0103(16) 
C1 0.044(11) 0.012(5) 0.018(7) -0.005(5) 0.017(8) -0.004(6) 
C2 0.035(8) 0.020(5) 0.024(6) -0.003(4) 0.021(6) -0.007(5) 
C1' 0.041(10) 0.028(6) 0.022(7) -0.003(5) 0.014(7) -0.006(5) 
C2' 0.039(7) 0.027(5) 0.029(5) -0.004(4) 0.021(5) -0.010(5) 
C3 0.056(3) 0.019(2) 0.031(3) -0.0043(19) 0.027(3) -0.007(2) 
C4 0.026(2) 0.022(2) 0.029(2) 0.0007(18) 0.016(2) -0.0026(18) 
C5 0.033(3) 0.028(3) 0.043(3) 0.002(2) 0.025(2) 0.002(2) 
C6 0.063(4) 0.023(3) 0.061(4) 0.019(2) 0.049(3) 0.016(2) 
C7 0.110(6) 0.037(3) 0.063(4) 0.026(3) 0.071(4) 0.029(3) 
C8 0.077(4) 0.024(3) 0.044(3) 0.010(2) 0.045(3) 0.015(3) 
C9 0.036(3) 0.027(2) 0.041(3) -0.004(2) 0.027(2) 0.001(2) 
C10 0.031(3) 0.034(3) 0.027(2) -0.002(2) 0.018(2) 0.007(2) 
C11 0.034(3) 0.024(2) 0.024(2) 0.0004(19) 0.018(2) 0.005(2) 
C12 0.037(3) 0.023(2) 0.028(2) 0.0002(18) 0.024(2) 0.0043(19) 
C13 0.044(3) 0.020(2) 0.037(3) 0.004(2) 0.028(3) 0.007(2) 
C14 0.048(3) 0.021(2) 0.036(3) -0.007(2) 0.027(3) -0.004(2) 
C15 0.034(3) 0.028(2) 0.031(3) -0.003(2) 0.018(2) -0.002(2) 
C16 0.033(3) 0.023(2) 0.030(3) 0.0001(19) 0.021(2) 0.0034(19) 
 
_geom_special_details 
; 
 All esds (except the esd in the dihedral angle between two l.s. planes) 
 are estimated using the full covariance matrix.  The cell esds are taken 
 into account individually in the estimation of esds in distances, angles 
 and torsion angles; correlations between esds in cell parameters are only 
 used when they are defined by crystal symmetry.  An approximate (isotropic) 
 treatment of cell esds is used for estimating esds involving l.s. planes. 
; 
 
loop_ 
 _geom_bond_atom_site_label_1 
 _geom_bond_atom_site_label_2 
 _geom_bond_distance 
 _geom_bond_site_symmetry_2 
 _geom_bond_publ_flag 
Ni1 N1 1.866(4) . ? 
Ni1 N2 1.951(4) . ? 
Ni1 S1 2.1500(12) . ? 
Ni1 S2 2.2170(12) . ? 
Ni2 N3 1.858(4) . ? 
Ni2 N4 1.934(4) . ? 
Ni2 S2 2.1605(13) . ? 
Ni2 S1 2.1984(13) 2_755 ? 
S1 C1' 1.834(14) . ? 
S1 C1 1.860(14) . ? 
S1 Ni2 2.1984(13) 2_755 ? 
S2 C9 1.837(5) . ? 
N1 C3 1.330(6) . ? 
N1 C2' 1.489(9) . ? 
N1 C2 1.495(10) . ? 
N2 C8 1.330(6) . ? 
N2 C4 1.345(6) . ? 
N3 C11 1.331(6) . ? 
N3 C10 1.458(6) . ? 
N4 C16 1.342(6) . ? 
N4 C12 1.357(6) . ? 
O1 O1' 0.573(15) . ? 
O1 C3 1.257(16) . ? 
O1' C3 1.272(14) . ? 
O2 C11 1.237(5) . ? 
C1 C2 1.511(14) . ? 
C1' C2' 1.502(13) . ? 
C3 C4 1.485(7) . ? 
C4 C5 1.399(6) . ? 
C5 C6 1.377(7) . ? 
C6 C7 1.355(8) . ? 
C7 C8 1.389(7) . ? 
C9 C10 1.517(7) . ? 
C11 C12 1.491(7) . ? 
C12 C13 1.384(7) . ? 
C13 C14 1.384(7) . ? 
C14 C15 1.362(7) . ? 
C15 C16 1.396(6) . ? 
 
loop_ 
 _geom_angle_atom_site_label_1 
 _geom_angle_atom_site_label_2 
 _geom_angle_atom_site_label_3 
 _geom_angle 
 _geom_angle_site_symmetry_1 
 _geom_angle_site_symmetry_3 
 _geom_angle_publ_flag 
N1 Ni1 N2 83.47(16) . . ? 
N1 Ni1 S1 87.33(12) . . ? 
N2 Ni1 S1 168.73(12) . . ? 
N1 Ni1 S2 178.39(14) . . ? 
N2 Ni1 S2 95.78(11) . . ? 
S1 Ni1 S2 93.25(5) . . ? 
N3 Ni2 N4 83.51(16) . . ? 
N3 Ni2 S2 88.50(12) . . ? 
N4 Ni2 S2 165.63(11) . . ? 
N3 Ni2 S1 175.11(12) . 2_755 ? 
N4 Ni2 S1 94.78(11) . 2_755 ? 
S2 Ni2 S1 94.10(5) . 2_755 ? 
C1' S1 C1 15.0(8) . . ? 
C1' S1 Ni1 100.2(5) . . ? 
C1 S1 Ni1 98.6(6) . . ? 
C1' S1 Ni2 113.4(7) . 2_755 ? 
C1 S1 Ni2 101.0(5) . 2_755 ? 
Ni1 S1 Ni2 112.78(6) . 2_755 ? 
C9 S2 Ni2 98.83(16) . . ? 
C9 S2 Ni1 108.44(17) . . ? 
Ni2 S2 Ni1 118.52(6) . . ? 
C3 N1 C2' 120.0(5) . . ? 
C3 N1 C2 117.3(5) . . ? 
C2' N1 C2 32.3(5) . . ? 
C3 N1 Ni1 118.1(3) . . ? 
C2' N1 Ni1 119.5(4) . . ? 
C2 N1 Ni1 121.6(5) . . ? 
C8 N2 C4 118.9(4) . . ? 
C8 N2 Ni1 129.1(3) . . ? 
C4 N2 Ni1 111.9(3) . . ? 
C11 N3 C10 119.2(4) . . ? 
C11 N3 Ni2 118.0(3) . . ? 
C10 N3 Ni2 122.5(3) . . ? 
C16 N4 C12 118.5(4) . . ? 
C16 N4 Ni2 128.9(3) . . ? 
C12 N4 Ni2 112.6(3) . . ? 
O1' O1 C3 78(3) . . ? 
O1 O1' C3 75(3) . . ? 
C2 C1 S1 107.6(10) . . ? 
C1 C2 N1 104.3(12) . . ? 
C2' C1' S1 109.1(9) . . ? 
C1' C2' N1 106.1(12) . . ? 
O1 C3 O1' 26.2(7) . . ? 
O1 C3 N1 129.2(9) . . ? 
O1' C3 N1 125.3(9) . . ? 
O1 C3 C4 117.4(9) . . ? 
O1' C3 C4 122.2(9) . . ? 
N1 C3 C4 110.9(4) . . ? 
N2 C4 C5 121.9(4) . . ? 
N2 C4 C3 115.5(4) . . ? 
C5 C4 C3 122.6(4) . . ? 
C6 C5 C4 118.0(5) . . ? 
C7 C6 C5 119.9(5) . . ? 
C6 C7 C8 119.6(5) . . ? 
N2 C8 C7 121.8(5) . . ? 
C10 C9 S2 110.7(3) . . ? 
N3 C10 C9 108.2(4) . . ? 
O2 C11 N3 127.8(5) . . ? 
O2 C11 C12 121.1(4) . . ? 
N3 C11 C12 111.0(4) . . ? 
N4 C12 C13 121.8(4) . . ? 
N4 C12 C11 114.2(4) . . ? 
C13 C12 C11 123.8(4) . . ? 
C12 C13 C14 118.9(4) . . ? 
C15 C14 C13 119.6(4) . . ? 
C14 C15 C16 119.2(5) . . ? 
N4 C16 C15 121.9(4) . . ? 
 
loop_ 
 _geom_torsion_atom_site_label_1 
 _geom_torsion_atom_site_label_2 
 _geom_torsion_atom_site_label_3 
 _geom_torsion_atom_site_label_4 
 _geom_torsion 
 _geom_torsion_site_symmetry_1 
 _geom_torsion_site_symmetry_2 
 _geom_torsion_site_symmetry_3 
 _geom_torsion_site_symmetry_4 
 _geom_torsion_publ_flag 
N1 Ni1 S1 C1' 2.9(6) . . . . ? 
N2 Ni1 S1 C1' -32.3(9) . . . . ? 
S2 Ni1 S1 C1' -175.6(6) . . . . ? 
N1 Ni1 S1 C1 -12.3(6) . . . . ? 
N2 Ni1 S1 C1 -47.5(8) . . . . ? 
S2 Ni1 S1 C1 169.2(6) . . . . ? 
N1 Ni1 S1 Ni2 -118.05(15) . . . 2_755 ? 
N2 Ni1 S1 Ni2 -153.3(6) . . . 2_755 ? 
S2 Ni1 S1 Ni2 63.45(6) . . . 2_755 ? 
N3 Ni2 S2 C9 -9.0(2) . . . . ? 
N4 Ni2 S2 C9 47.1(5) . . . . ? 
S1 Ni2 S2 C9 175.16(17) 2_755 . . . ? 
N3 Ni2 S2 Ni1 107.68(13) . . . . ? 
N4 Ni2 S2 Ni1 163.8(4) . . . . ? 
S1 Ni2 S2 Ni1 -68.17(7) 2_755 . . . ? 
N1 Ni1 S2 C9 -48(5) . . . . ? 
N2 Ni1 S2 C9 -110.5(2) . . . . ? 
S1 Ni1 S2 C9 62.73(17) . . . . ? 
N1 Ni1 S2 Ni2 -160(5) . . . . ? 
N2 Ni1 S2 Ni2 138.05(12) . . . . ? 
S1 Ni1 S2 Ni2 -48.69(7) . . . . ? 
N2 Ni1 N1 C3 -1.0(4) . . . . ? 
S1 Ni1 N1 C3 -174.5(4) . . . . ? 
S2 Ni1 N1 C3 -63(5) . . . . ? 
N2 Ni1 N1 C2' -163.4(7) . . . . ? 
S1 Ni1 N1 C2' 23.1(7) . . . . ? 
S2 Ni1 N1 C2' 134(5) . . . . ? 
N2 Ni1 N1 C2 158.9(8) . . . . ? 
S1 Ni1 N1 C2 -14.5(8) . . . . ? 
S2 Ni1 N1 C2 97(5) . . . . ? 
N1 Ni1 N2 C8 -176.8(5) . . . . ? 
S1 Ni1 N2 C8 -141.4(5) . . . . ? 
S2 Ni1 N2 C8 1.7(5) . . . . ? 
N1 Ni1 N2 C4 -0.8(3) . . . . ? 
S1 Ni1 N2 C4 34.6(8) . . . . ? 
S2 Ni1 N2 C4 177.7(3) . . . . ? 
N4 Ni2 N3 C11 7.5(3) . . . . ? 
S2 Ni2 N3 C11 175.6(3) . . . . ? 
S1 Ni2 N3 C11 -62.3(16) 2_755 . . . ? 
N4 Ni2 N3 C10 -179.3(4) . . . . ? 
S2 Ni2 N3 C10 -11.3(3) . . . . ? 
S1 Ni2 N3 C10 110.9(14) 2_755 . . . ? 
N3 Ni2 N4 C16 172.2(4) . . . . ? 
S2 Ni2 N4 C16 115.6(5) . . . . ? 
S1 Ni2 N4 C16 -12.4(4) 2_755 . . . ? 
N3 Ni2 N4 C12 -5.5(3) . . . . ? 
S2 Ni2 N4 C12 -62.1(6) . . . . ? 
S1 Ni2 N4 C12 169.9(3) 2_755 . . . ? 
C1' S1 C1 C2 -61(3) . . . . ? 
Ni1 S1 C1 C2 36.9(15) . . . . ? 
Ni2 S1 C1 C2 152.2(13) 2_755 . . . ? 
S1 C1 C2 N1 -47.5(16) . . . . ? 
C3 N1 C2 C1 -158.6(10) . . . . ? 
C2' N1 C2 C1 -54.9(13) . . . . ? 
Ni1 N1 C2 C1 41.3(15) . . . . ? 
C1 S1 C1' C2' 59(3) . . . . ? 
Ni1 S1 C1' C2' -26.5(15) . . . . ? 
Ni2 S1 C1' C2' 93.9(14) 2_755 . . . ? 
S1 C1' C2' N1 42.8(17) . . . . ? 
C3 N1 C2' C1' 153.0(10) . . . . ? 
C2 N1 C2' C1' 58.5(13) . . . . ? 
Ni1 N1 C2' C1' -45.0(14) . . . . ? 
O1' O1 C3 N1 92(4) . . . . ? 
O1' O1 C3 C4 -108(3) . . . . ? 
O1 O1' C3 N1 -108(3) . . . . ? 
O1 O1' C3 C4 87(4) . . . . ? 
C2' N1 C3 O1 -34.1(13) . . . . ? 
C2 N1 C3 O1 2.8(13) . . . . ? 
Ni1 N1 C3 O1 163.6(8) . . . . ? 
C2' N1 C3 O1' -1.4(13) . . . . ? 
C2 N1 C3 O1' 35.5(13) . . . . ? 
Ni1 N1 C3 O1' -163.7(8) . . . . ? 
C2' N1 C3 C4 164.7(8) . . . . ? 
C2 N1 C3 C4 -158.4(8) . . . . ? 
Ni1 N1 C3 C4 2.4(6) . . . . ? 
C8 N2 C4 C5 -0.4(7) . . . . ? 
Ni1 N2 C4 C5 -176.9(4) . . . . ? 
C8 N2 C4 C3 178.8(5) . . . . ? 
Ni1 N2 C4 C3 2.3(5) . . . . ? 
O1 C3 C4 N2 -166.8(8) . . . . ? 
O1' C3 C4 N2 163.5(8) . . . . ? 
N1 C3 C4 N2 -3.1(7) . . . . ? 
O1 C3 C4 C5 12.4(10) . . . . ? 
O1' C3 C4 C5 -17.3(10) . . . . ? 
N1 C3 C4 C5 176.1(5) . . . . ? 
N2 C4 C5 C6 1.5(7) . . . . ? 
C3 C4 C5 C6 -177.6(5) . . . . ? 
C4 C5 C6 C7 -1.7(8) . . . . ? 
C5 C6 C7 C8 0.9(10) . . . . ? 
C4 N2 C8 C7 -0.5(8) . . . . ? 
Ni1 N2 C8 C7 175.3(5) . . . . ? 
C6 C7 C8 N2 0.2(10) . . . . ? 
Ni2 S2 C9 C10 27.1(3) . . . . ? 
Ni1 S2 C9 C10 -97.1(3) . . . . ? 
C11 N3 C10 C9 -155.7(4) . . . . ? 
Ni2 N3 C10 C9 31.2(5) . . . . ? 
S2 C9 C10 N3 -36.2(5) . . . . ? 
C10 N3 C11 O2 1.8(7) . . . . ? 
Ni2 N3 C11 O2 175.1(4) . . . . ? 
C10 N3 C11 C12 179.1(4) . . . . ? 
Ni2 N3 C11 C12 -7.5(5) . . . . ? 
C16 N4 C12 C13 1.9(6) . . . . ? 
Ni2 N4 C12 C13 179.8(4) . . . . ? 
C16 N4 C12 C11 -175.0(4) . . . . ? 
Ni2 N4 C12 C11 2.9(5) . . . . ? 
O2 C11 C12 N4 -179.8(4) . . . . ? 
N3 C11 C12 N4 2.7(6) . . . . ? 
O2 C11 C12 C13 3.4(7) . . . . ? 
N3 C11 C12 C13 -174.1(4) . . . . ? 
N4 C12 C13 C14 -2.5(7) . . . . ? 
C11 C12 C13 C14 174.1(4) . . . . ? 
C12 C13 C14 C15 0.0(7) . . . . ? 
C13 C14 C15 C16 2.9(7) . . . . ? 
C12 N4 C16 C15 1.1(7) . . . . ? 
Ni2 N4 C16 C15 -176.4(3) . . . . ? 
C14 C15 C16 N4 -3.5(7) . . . . ? 
 
_diffrn_measured_fraction_theta_max    0.999 
_diffrn_reflns_theta_full              25.99 
_diffrn_measured_fraction_theta_full   0.999 
_refine_diff_density_max    0.583 
_refine_diff_density_min   -0.622 
_refine_diff_density_rms    0.109 
